# Supplementary material
Source: PubMed Central journal article supplement (PMC2956798)
Supplement: NIHMS216289-supplement-1.pdf [file NIHMS216289-supplement-1.pdf]

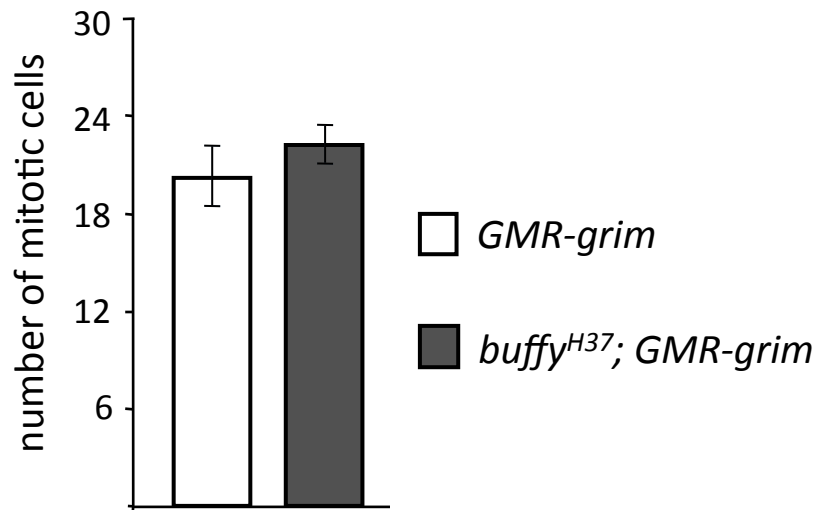

### Supplementary Figure 2:

Loss of *buffy* does not lead to increased cell division when *grim* is expressed.

Mitotic cells posterior to the morphogenetic furrow were identified using an anti-phosphohistone H3 antibody on eye discs dissected from wandering third instar larvae grown at 29°C. A previous study also demonstrated no effect of loss of *buffy* on cell division (Sevrioukov *et al.* Genesis 2005). The number of mitotic cells per eye disc was counted. Shown is the mean and SEM (N=11 for *GMR-grim* and N=10 for *buffy<sup>H37</sup>; GMR-grim*). The difference between the genotypes is not significant based on an unpaired two-tailed Student's *t* test.
